# Supplementary material for: Spectroscopic and redox properties of amine-functionalized K2[OsII(bpy)(CN)4] complexes
Source: Royal Society of Chemistry journal article supplement (doi:10.1039/c0dt01478h), 2011-01-01

## Spectroscopic and Redox Properties of Amine-Functionalized $K_2[Os^{II}(bpy)(CN)_4]$ Complexes

Michael J. Ahrens,<sup>\*a</sup> Paul A. Bertin,<sup>a</sup> Adam G. Gaustad,<sup>a</sup> Dimitra Georganopoulou,<sup>a</sup> Markus Wunder,<sup>a</sup>  
Gary F. Blackburn,<sup>a</sup> Harry B. Gray,<sup>b</sup> and Thomas J. Meade<sup>\*c</sup>

<sup>a</sup>Ohmx Corporation, 1801 Maple Avenue, Suite 6143, Evanston, Illinois 60201, USA. E-mail: michael@ohmx.com. Fax: 1-847-491-8510

<sup>b</sup>Arnold and Mabel Beckman Laboratories of Chemical Synthesis, California Institute of Technology, 1200 East California Blvd. MC 139-74, Pasadena, California, 91125, USA.

<sup>c</sup>Departments of Chemistry, Biochemistry and Molecular and Cell Biology, Neurobiology and Physiology, and Radiology, Northwestern University, 2145 Sheridan Road, Evanston, Illinois 60208, USA. E-mail: tmeade@northwestern.edu

|                                                                                                            |   |
|------------------------------------------------------------------------------------------------------------|---|
| Electronic spectra for complexes 1–6.....                                                                  | 2 |
| Molar absorptivity data for complexes 1–6.....                                                             | 2 |
| Cyclic voltammetry data for complexes 1–6.....                                                             | 3 |
| $K_2[Os(CN)_4-5\text{-aminoethyl-}5'\text{-methyl-}2,2'\text{-bipyridine}]$ NMR characterization data..... | 4 |
| $K_2[Os(CN)_4-5,5'\text{-dimethyl-}2,2'\text{-bipyridine}]$ NMR characterization data.....                 | 5 |
| $K_2[Os(CN)_4-5,5'\text{-bis(aminomethyl)-}2,2'\text{-bipyridine}]$ NMR characterization data.....         | 6 |
| $K_2[Os(CN)_4-4\text{-aminoethyl-}4'\text{-methyl-}2,2'\text{-bipyridine}]$ NMR characterization data..... | 7 |
| $K_2[Os(CN)_4-4,4'\text{-dimethyl-}2,2'\text{-bipyridine}]$ NMR characterization data.....                 | 8 |
| $K_2[Os(CN)_4-4,4'\text{-bis(aminomethyl)-}2,2'\text{-bipyridine}]$ NMR characterization data.....         | 9 |

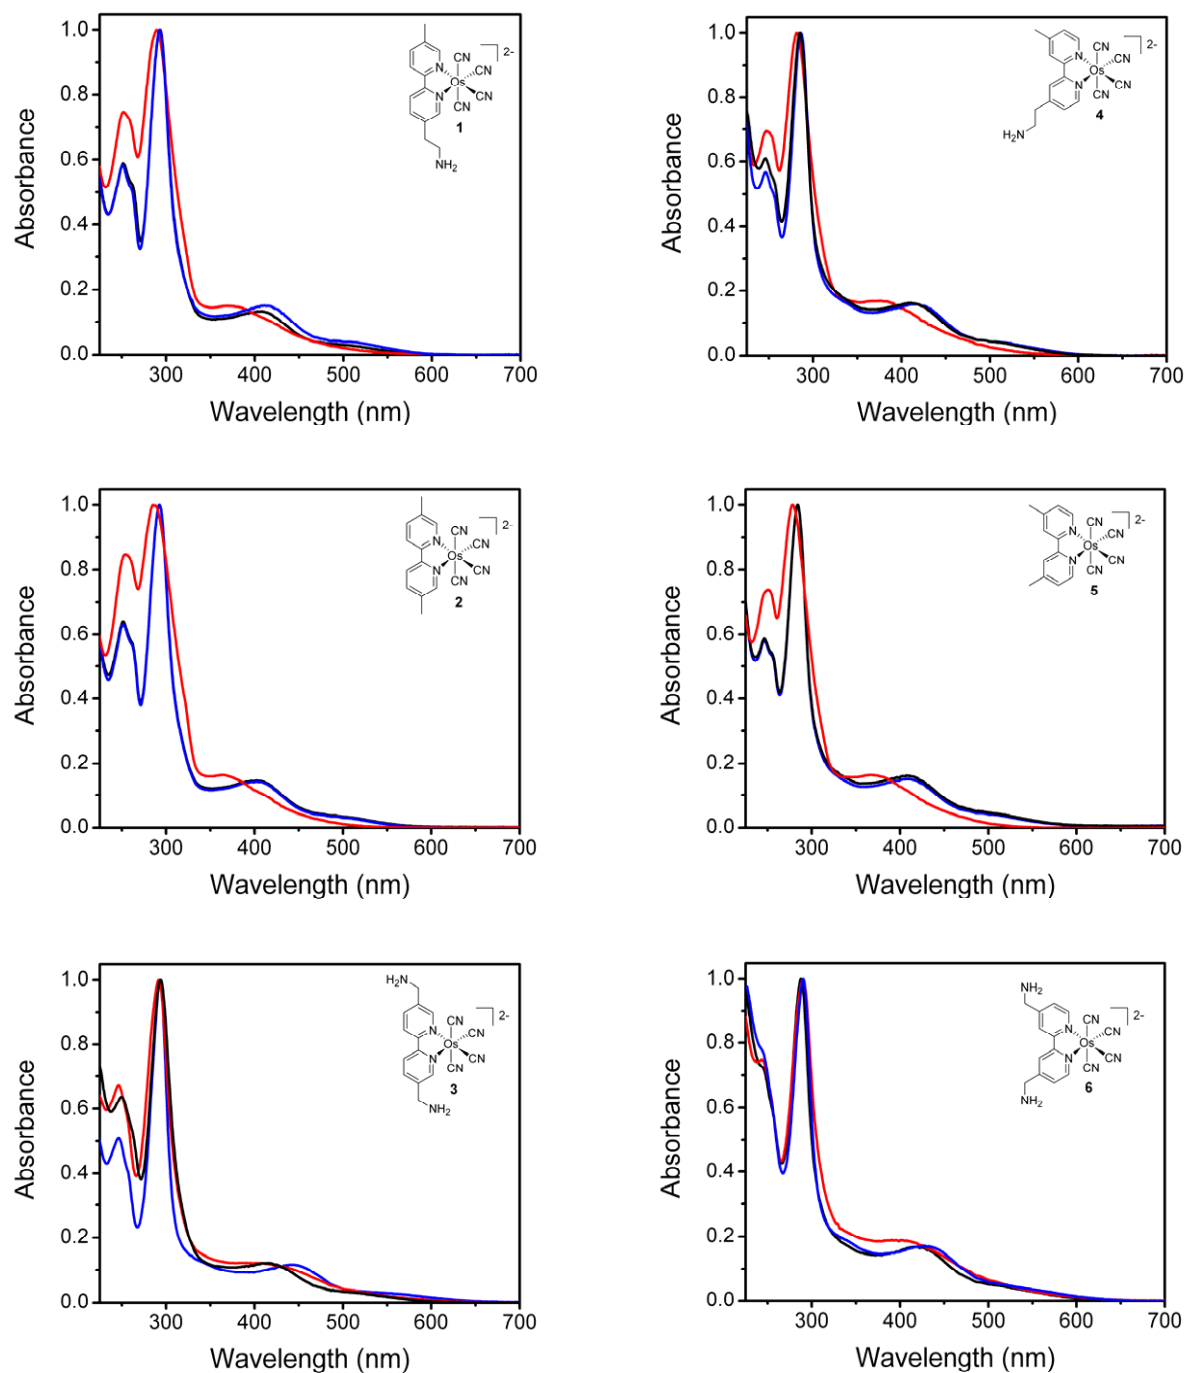

**Figure S1** Electronic spectra for complexes 1–6 in water at pH = 1.5 (—), 5.5 (—), and 12 (—).

**Table S1** Molar absorptivities ( $\times 10^{-3}$ ) for complexes 1–6.

| complex  | $\lambda_{\text{IL}}$ ( $\text{cm}^{-1}$ ) | $\epsilon$ ( $\text{M}^{-1} \text{cm}^{-1}$ ) | $\lambda_{\text{MLCT}}$ ( $\text{cm}^{-1}$ ) | $\epsilon$ ( $\text{M}^{-1} \text{cm}^{-1}$ ) |
|----------|--------------------------------------------|-----------------------------------------------|----------------------------------------------|-----------------------------------------------|
| <b>1</b> | 294                                        | 19.5                                          | 408                                          | 3.1                                           |
| <b>2</b> | 294                                        | 23.0                                          | 404                                          | 3.5                                           |
| <b>3</b> | 294                                        | 23.5                                          | 414                                          | 3.3                                           |
| <b>4</b> | 286                                        | 19.6                                          | 409                                          | 3.2                                           |
| <b>5</b> | 285                                        | 20.6                                          | 410                                          | 3.1                                           |
| <b>6</b> | 292                                        | 19.6                                          | 418                                          | 3.1                                           |

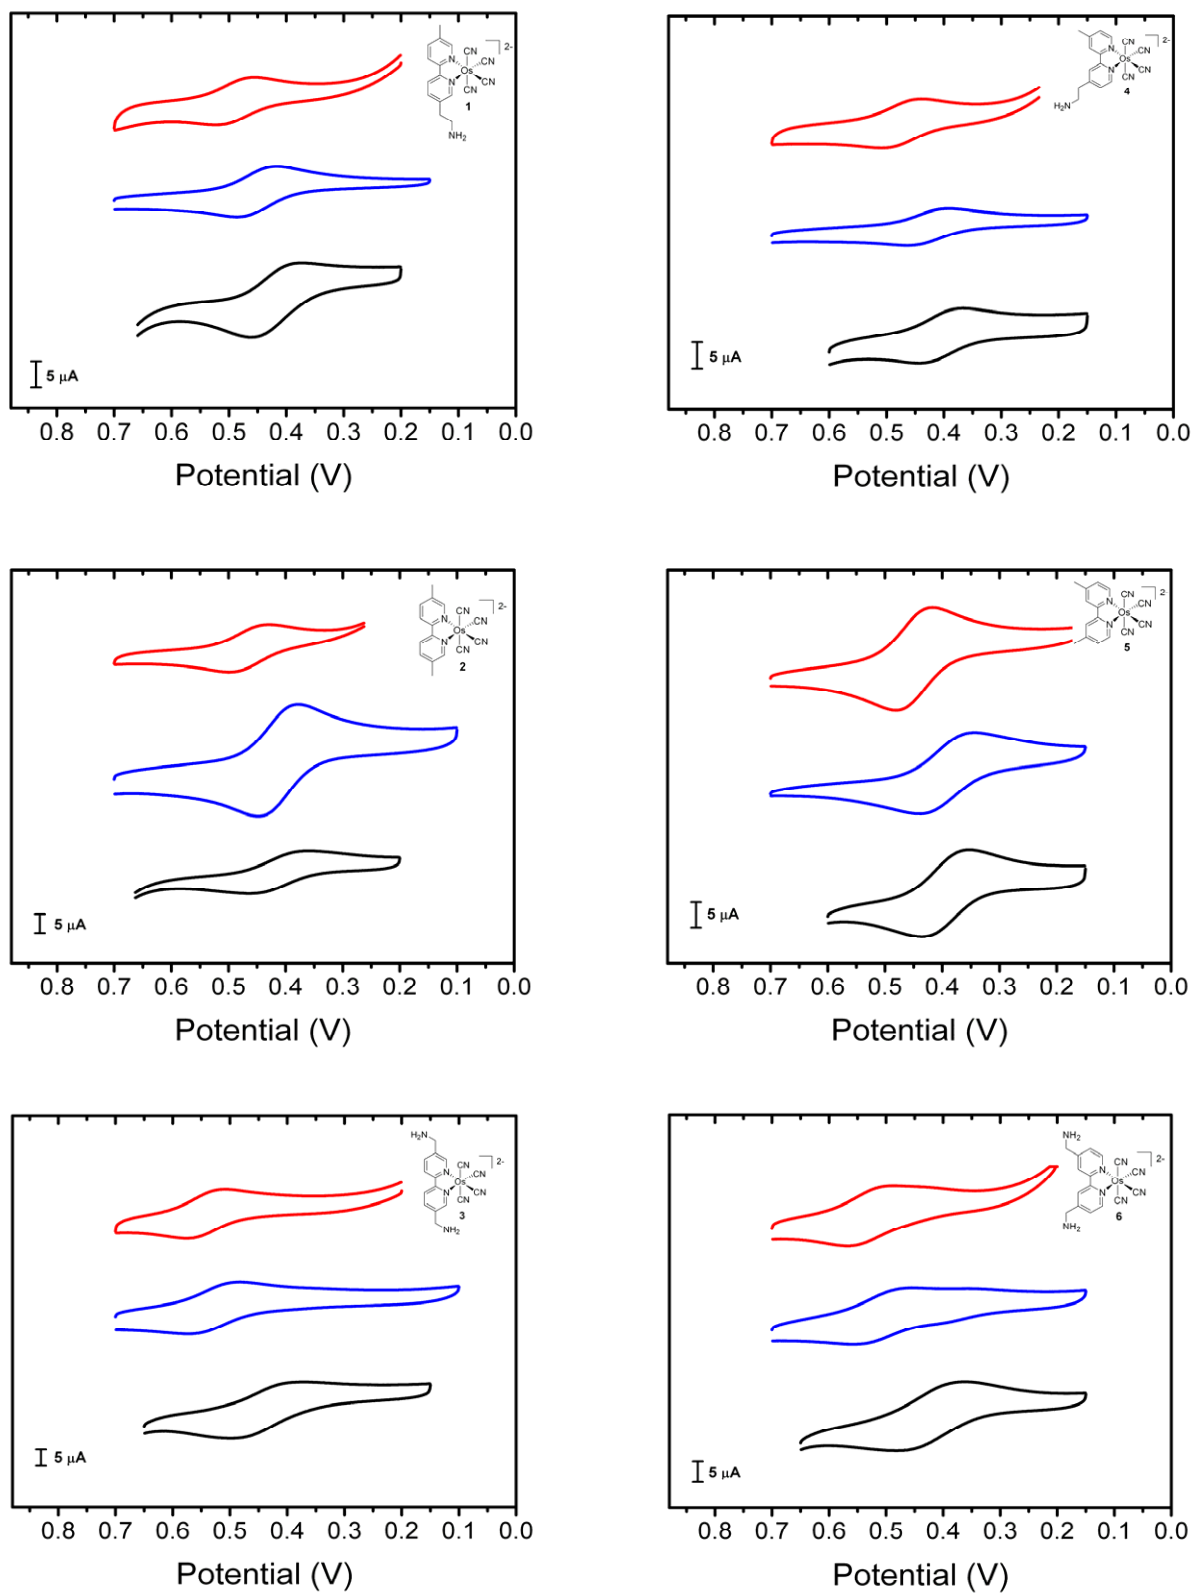

Figure S2 Cyclic voltammograms for complexes 1–6 in 0.1 M KCl at pH = 1.5 (→), 5.5 (→), and 12 (→).

Ohm $\gamma$ <sup>TM</sup>

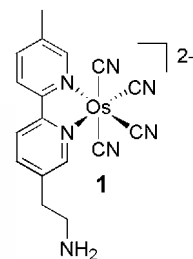

<sup>1</sup>H NMR

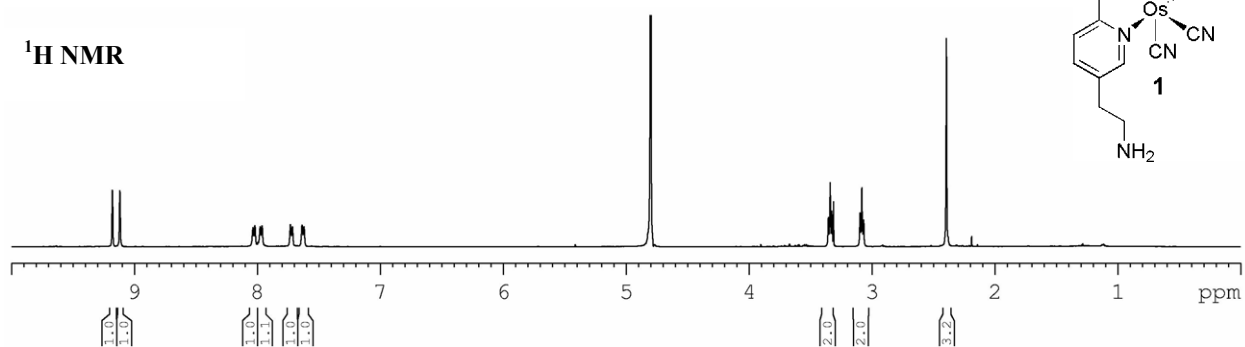

<sup>13</sup>C NMR

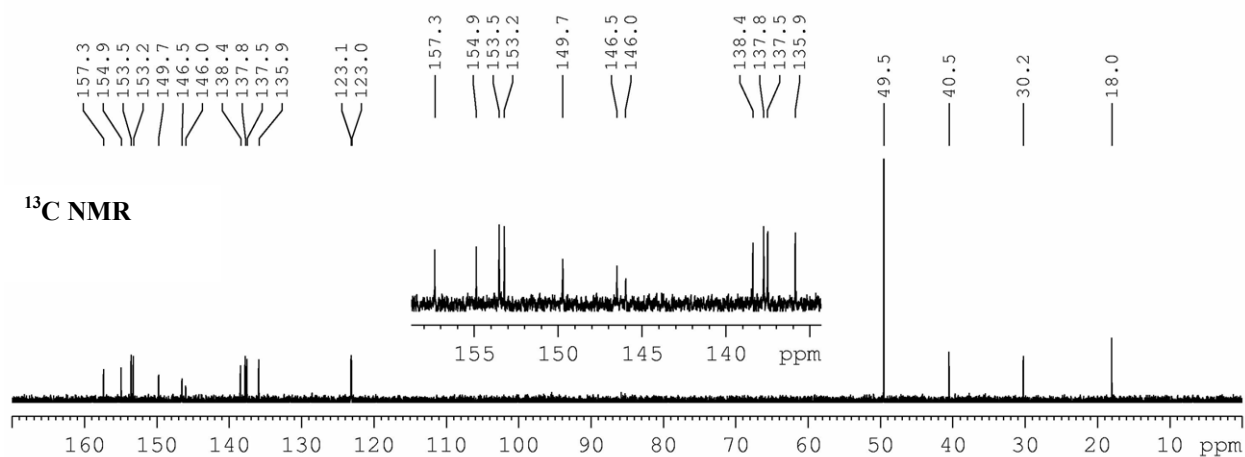

<sup>13</sup>C DEPT (CH, CH<sub>3</sub> positive; CH<sub>2</sub> negative)

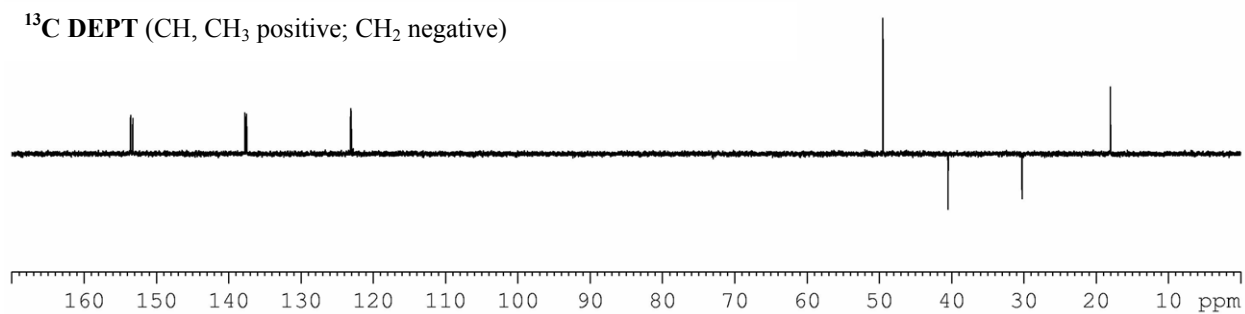

Ohm<sup>®</sup>

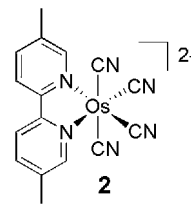

**<sup>1</sup>H NMR**

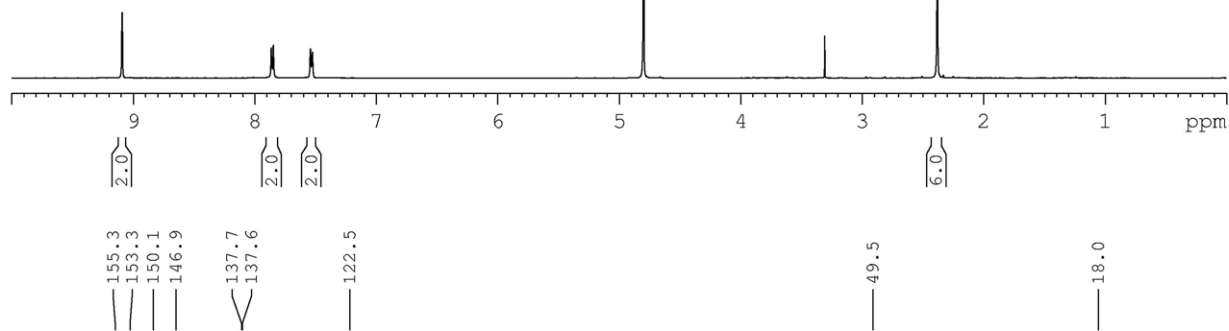

**<sup>13</sup>C NMR**

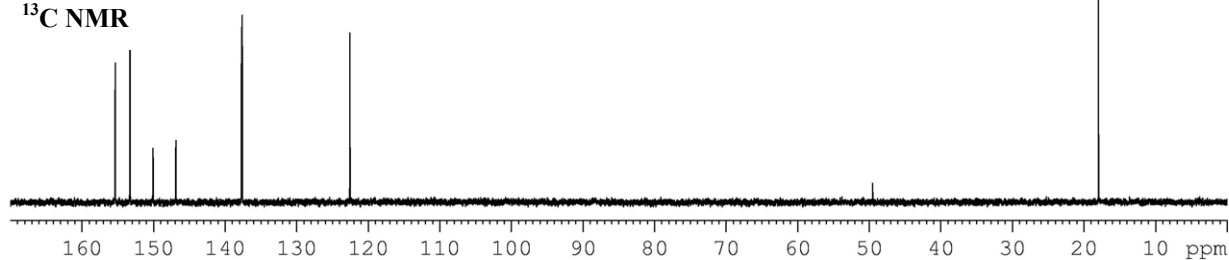

**<sup>13</sup>C DEPT (CH, CH<sub>3</sub> positive; CH<sub>2</sub> negative)**

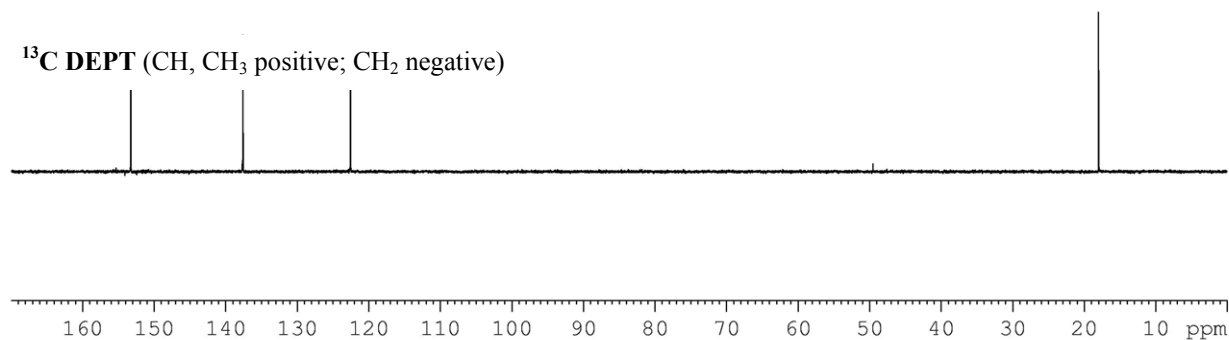

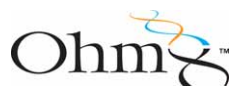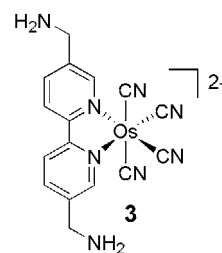

**<sup>1</sup>H NMR**

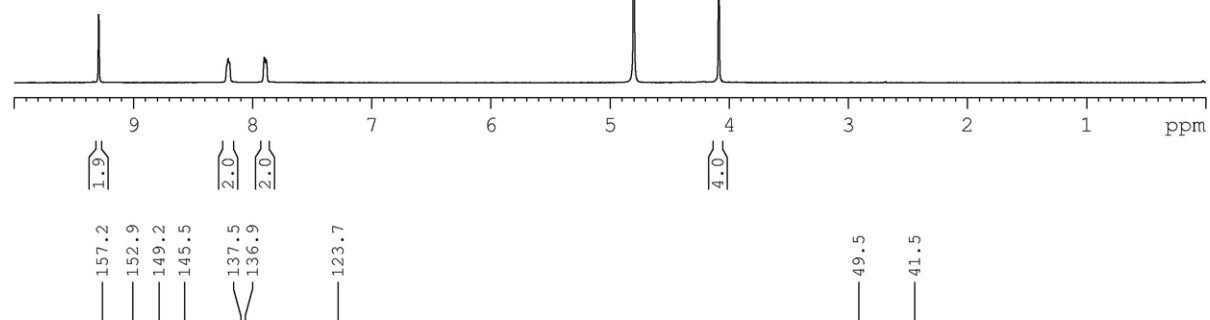

**<sup>13</sup>C NMR**

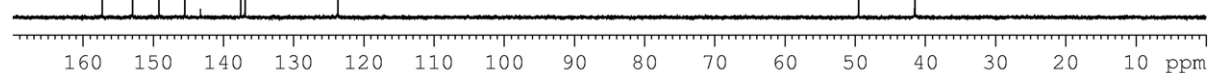

**<sup>13</sup>C DEPT (CH, CH<sub>3</sub> positive; CH<sub>2</sub> negative)**

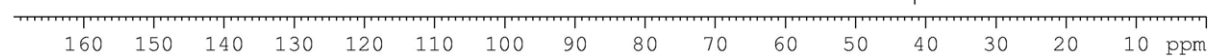

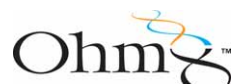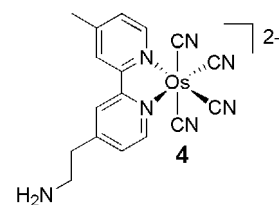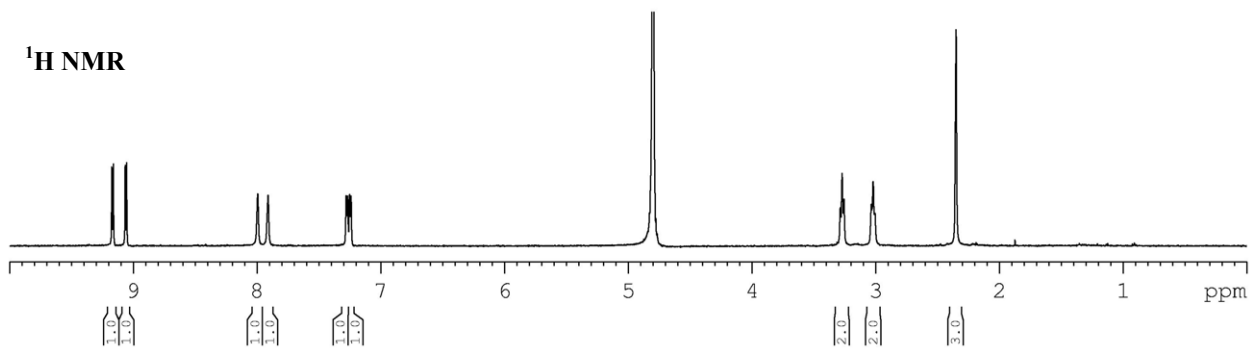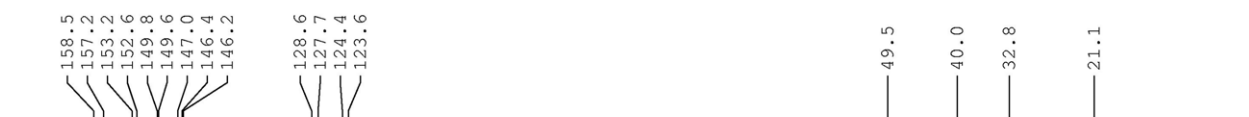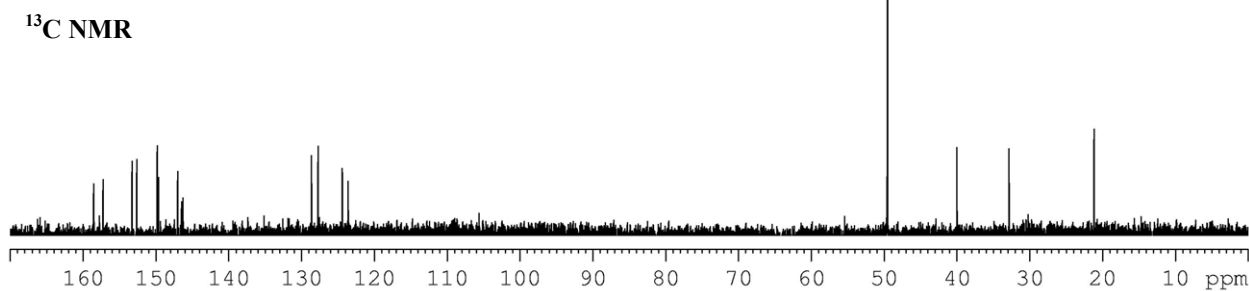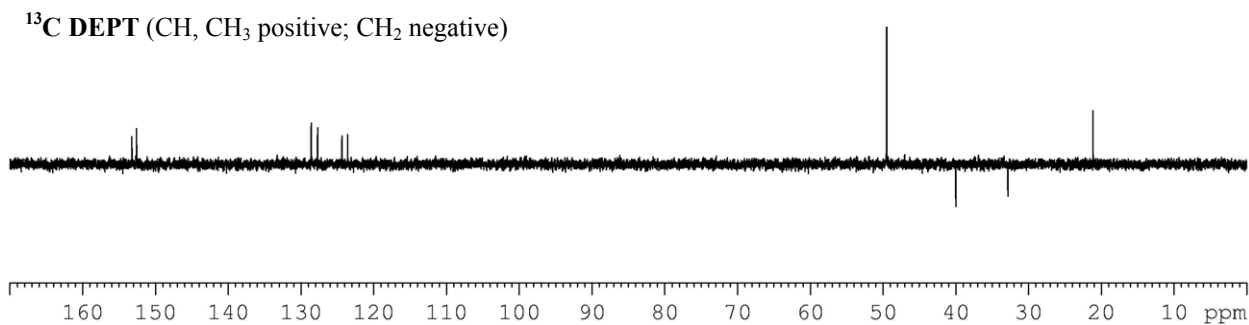

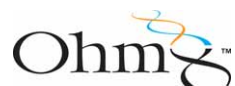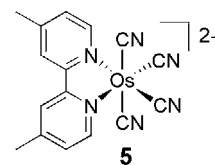

### <sup>1</sup>H NMR

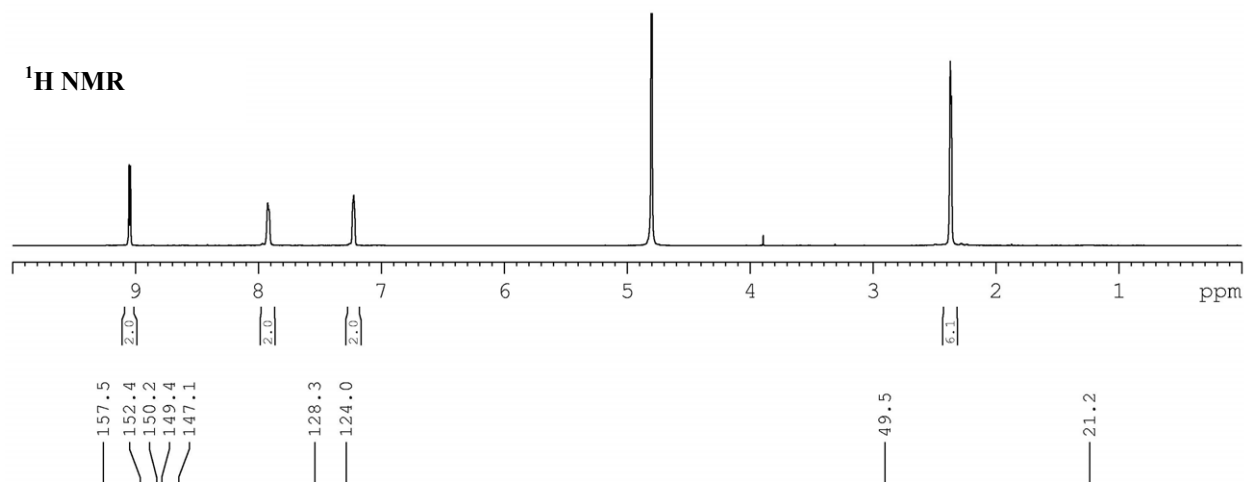

### <sup>13</sup>C NMR

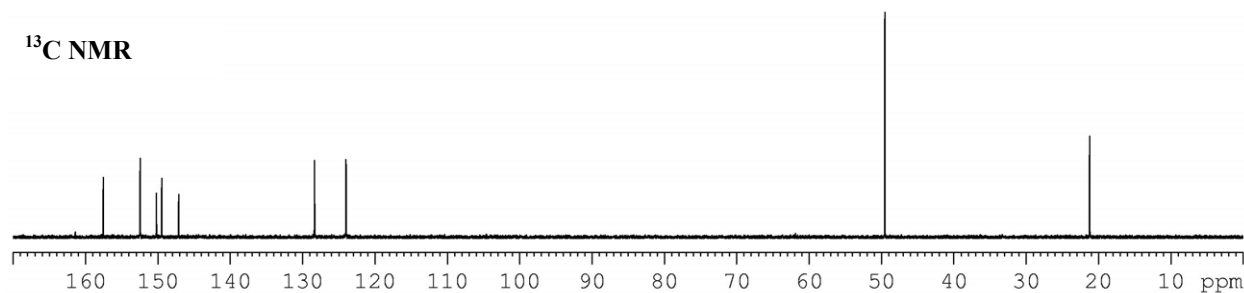

### <sup>13</sup>C DEPT (CH, CH<sub>3</sub> positive; CH<sub>2</sub> negative)

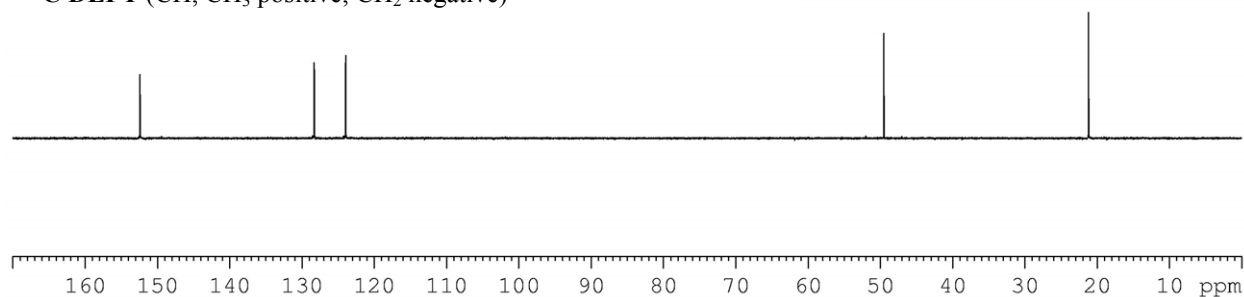



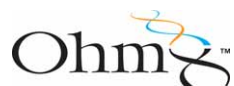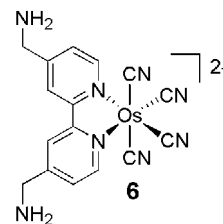

**<sup>1</sup>H NMR**

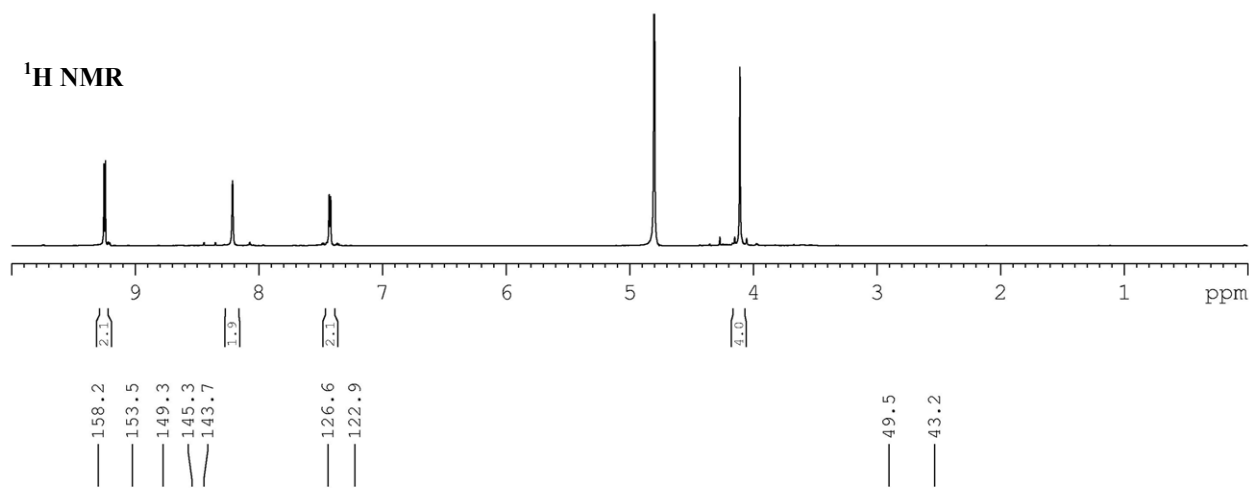

**<sup>13</sup>C NMR**

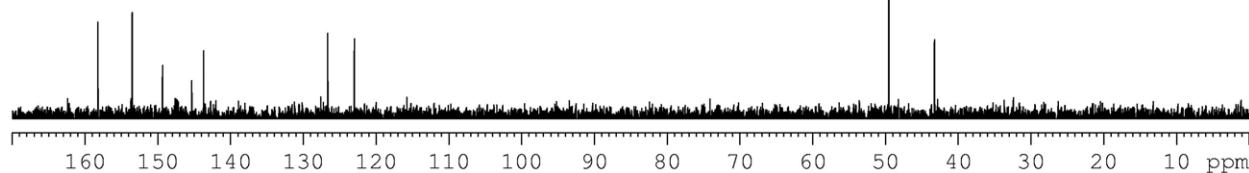

**<sup>13</sup>C DEPT (CH, CH<sub>3</sub> positive; CH<sub>2</sub> negative)**

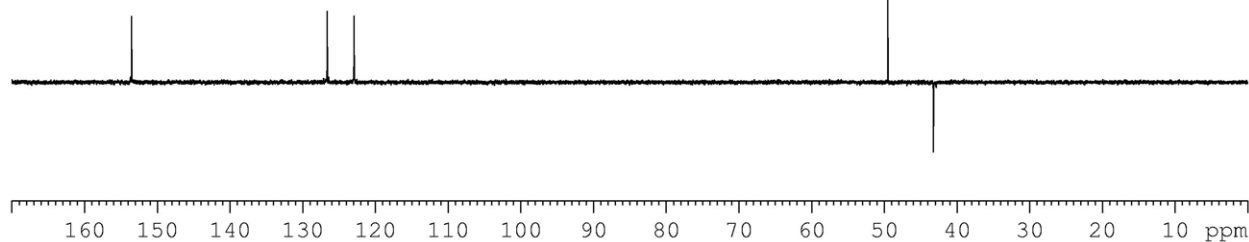

Supplement: c0dt01478h.pdf [file c0dt01478h.pdf]
